# Supplementary material for: Liver Frailty Index for Prediction of Short-Term Rehospitalization in Patients with Liver Cirrhosis
Source: MDPI journal article supplement (doi:10.3390/diagnostics12051069), 2022-04-24
Supplement: s1 [file s1]

**Supplementary Table S1.** Multivariable Cox-regression analyses of risk factors for 30-day rehospitalization in patients with cirrhosis.

| Variable           | Model            |          |
|--------------------|------------------|----------|
|                    | HR               | <i>p</i> |
| Platelets (95% CI) | 0.98 (0.97–0.99) | 0.01     |
| LFI (95% CI)       | 1.65 (1.07–2.55) | 0.02     |

LFI, liver frailty index; CI, 95% confidence interval; Multivariable Cox-regression model with a stepwise variable selection process (only the significant variables are displayed in the table). Variables that did not reach significance: Haemoglobin ( $p = 0.37$ ), sodium ( $p = 0.08$ ), albumin ( $p = 0.54$ ), history of OHE ( $p = 0.25$ ), history of ascites ( $p = 0.12$ ), MELD ( $p = 0.26$ ), age ( $p = 0.31$ ), gender ( $p = 0.98$ ), Charlson Comorbidity Index ( $p = 0.88$ ).
